# Supplementary material
Source: publisher figshare collection journal article supplement (https://acs.figshare.com/ndownloader/files/4403680)
Supplement: Supplementary file 1 [file 4403680]

# Thermo-induced lipid oxidation of culinary oils: a kinetic study of the oxidation products by magnetic resonance spectroscopies

## Supporting Information

*Adriano Silvagni, Lorenzo Franco, Alessandro Bagno, and Federico Rastrelli\**

*Dipartimento di Scienze Chimiche, Università di Padova,*

*via Marzolo, 1 - 35131 Padova (Italy)*

*federico.rastrelli@unipd.it*

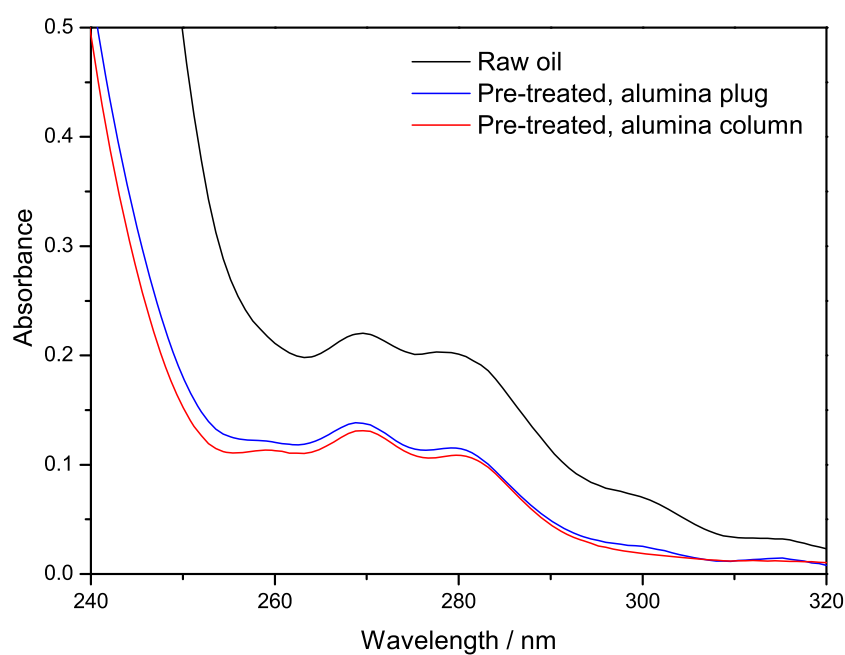

**Figure S1.** UV-Vis spectrum of an olive oil sample before and after pre-treatment to remove peroxides.

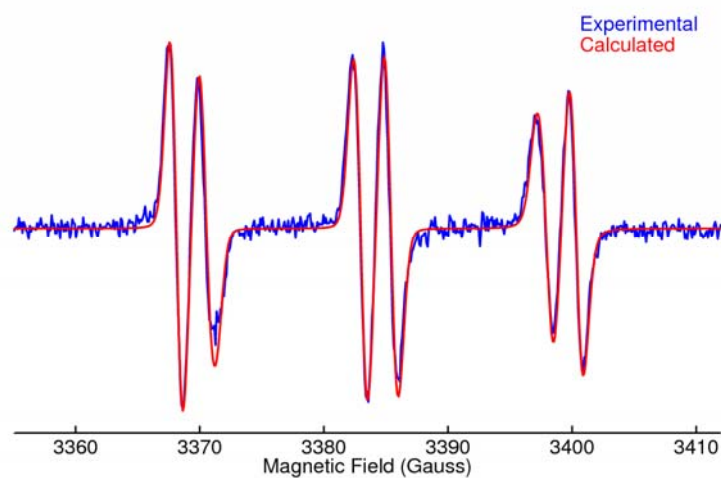

**Figure S2.** Experimental (blue) and calculated (red) EPR spectra resulting from a sample of peanut oil with added PBN and heated for 10 minutes at 180 °C open to air. The calculated spectrum consists of a 65% contribution from radical **1** and a 35% contribution from radical **2**.

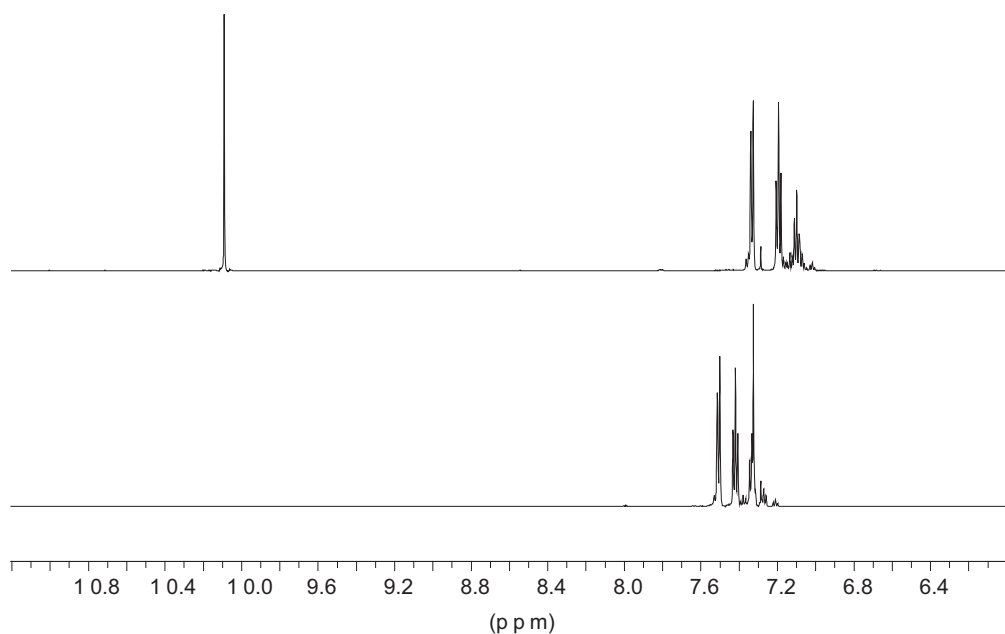

**Figure S3.**  $^1\text{H}$  NMR spectrum of cumene hydroperoxide recorded in plain  $\text{CDCl}_3$  (lower trace) and in  $\text{CDCl}_3$ :DMSO = 9:1 mixture (upper trace). The DMSO oxygen coordinates to the peroxidic hydrogen, thus shifting its signal downfield.

## Estimates of the kinetic constants

*General procedure.* In order to stabilize the results of the multiparametric fitting, after finding an initial best-fit set, we allowed a single kinetic constant to vary and determined the confidence interval on each one. All the estimated errors reported in the table are evaluated at a 95% confidence level.

*Estimates of  $k_1$  from EPR spectra ( $ST$ = spin trap)*

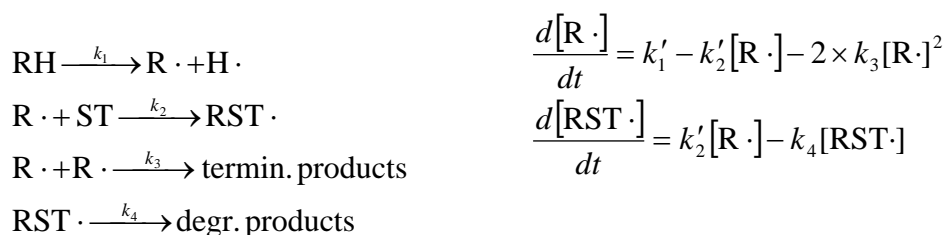

Estimated parameters:

$k_1' = k_1[RH] = (1.08 \pm 0.03) \times 10^{-4} \text{ M s}^{-1}$ ;  $k_2' = k_2[ST] = (2.73 \pm 0.03) \times 10^{-1} \text{ s}^{-1}$ ;  $k_4 = (2.79 \pm 0.04) \times 10^{-3} \text{ s}^{-1}$ .  $k_3$  was set to  $10^9 \text{ M}^{-1} \text{ s}^{-1}$  according to ref. [S1] and not varied during the fitting procedure.

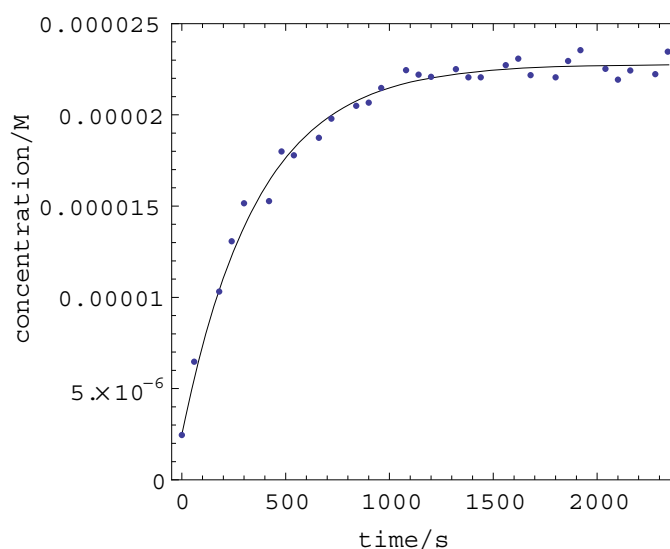

**Figure S4.** Best fitting curve to the experimental data set of radical **2** (degassed sample) as resulting from the kinetic model described in the text.

Even though it is difficult to compare the above rate constants with literature values measured under different conditions [S2, S3], we can nevertheless validate our values on a qualitative basis. In fact, prolonged heating of fatty acid methyl esters at 105 °C (see Fig. 1 of ref. [S4]) indeed shows that PBN adducts are fairly stable, especially those originating from methyl oleate and linoleate. As a consequence, the degradation constant  $k_4$  is expected to be small, which is what we also find for our system.

Similarly, we find the constant  $k_2$  to be quite small, indicating that the reaction between an alkyl radical and the PBN is not so fast as one would expect. Fig. 4 of the paper highlights that the formation of adduct 1, albeit originating from an alkyl radical and a subsequent degradation product of the PBN-peroxyl radical adduct, is markedly faster than the direct reaction between an alkyl radical and the PBN itself. As a consequence, step 2 of the above kinetic scheme appears to be intrinsically slow.

#### *Estimates of $k_n$ ( $n= 3, 8$ ) from NMR spectra*

| Constants | Pre-treated sample                           | Raw sample                                   | Units                         |
|-----------|----------------------------------------------|----------------------------------------------|-------------------------------|
| $k_1'$    | $(1.08 \pm 0.03) \times 10^{-4} \text{ (a)}$ | $(1.08 \pm 0.03) \times 10^{-4} \text{ (a)}$ | $\text{M s}^{-1}$             |
| $k_2'$    | $10^6$                                       | $10^6$                                       | $\text{s}^{-1}$               |
| $k_3'$    | $0.50 \pm 0.01$                              | $0.31 \pm 0.02$                              | $\text{s}^{-1}$               |
| $k_{3b}$  | $(2.52 \pm 0.05) \times 10^5$                | $(1.83 \pm 0.07) \times 10^5$                | $\text{M}^{-1} \text{s}^{-1}$ |
| $k_4$     | $(8.8 \pm 0.1) \times 10^6$                  | $(9.1 \pm 0.3) \times 10^6$                  | $\text{M}^{-1} \text{s}^{-1}$ |
| $k_5$     | $(4.4 \pm 0.1) \times 10^{-4}$               | $(7.3 \pm 0.3) \times 10^{-4}$               | $\text{s}^{-1}$               |
| $k_6$     | $(7.1 \pm 0.1) \times 10^2$                  | $(5.9 \pm 0.2) \times 10^2$                  | $\text{s}^{-1}$               |
| $k_7$     | $(2.5 \pm 0.1) \times 10^2$                  | $(2.1 \pm 0.1) \times 10^2$                  | $\text{s}^{-1}$               |
| $k_8$     | $(4.26 \pm 0.07) \times 10^3$                | $(3.07 \pm 0.08) \times 10^3$                | $\text{s}^{-1}$               |

An estimate of  $k_2'$  value is not possible from the fitting procedure, since it is associated to a very fast process preceding a slow reaction ( $k_3'$ ) and it can span a very wide range. Its value was thus fixed at  $10^6 \text{ s}^{-1}$ , which is the maximum known

value for  $k_2$ , ( $10^9 \text{ M}^{-1}\text{s}^{-1}$  [S1]) multiplied by the average oxygen concentration in oil under normal conditions ( $10^{-3} \text{ M}$  [S5]).

## References

- [S1] Doktorov, A. B.; Lukzen, N. N.; Pedersen, J. B. *J. Phys. Chem. B* **2008**, *112*, 11854-11861
- [S2] Maeda, Y; Ingold, K. U. *J. Am. Chem. Soc.* **1979**, *101*, 4975-4981
- [S3] Rosen, G.M.; Britigan, B. E.; Halpern, H. J.; Pou, S. "Free Radicals: biology and detection by spin trapping" Oxford University Press, Oxford (1999), chapter 8.
- [S4] Vicente, M. L.; Empis, J. A.; Deighton, N.; Glidewell, S. M.; Goodman, B. A.; Rowlands, C. C. *J. Chem. Soc., Perkin Trans. 2*, **1998**, 449-454.
- [S5] Parenti, A.; Spugnoli, P. ; Masella, P.; Calamai, L. *Eur. J. Lipid Sci. Technol.* **2007**, 1180-1185
